# Supplementary material for: Lung Cancer Gene Regulatory Network of Transcription Factors Related to the Hallmarks of Cancer
Source: MDPI journal article supplement (doi:10.3390/cimb45010029), 2023-01-05
Supplement: s1 [file s1]

| DOWN     | UALCAN-TCGA-LUAD     | UALCAN-TCGA-LUSC     | UP       | UALCAN-TCGA-LUAD     | UALCAN-TCGA-LUSC     |
|----------|----------------------|----------------------|----------|----------------------|----------------------|
| ABCA8    | 1.62447832963153E-12 | 1.62447832963153E-12 | AARS     | 1.62436730732907E-12 | <1E-12               |
| ACACB    | 1.62470037423645E-12 | <1E-12               | ABCA12   | 1.62447832963153E-12 | <1E-12               |
| ACADL    | 1.62447832963153E-12 | 1.62447832963153E-12 | ACTL6A   | <1E-12               | 1.62447832963153E-12 |
| ACTG2    | 1.41389999708252E-09 | 5.28610000216645E-08 | ALDH18A1 | 1.62447832963153E-12 | 1.62436730732907E-12 |
| ACTN2    | 3.33066907387547E-16 | 1.62447832963153E-12 | APEX1    | <1E-12               | 1.62458935193399E-12 |
| ACVRL1   | <1E-12               | 1.62447832963153E-12 | ASF1B    | 1.62436730732907E-12 | <1E-12               |
| ADAMTS8  | <1E-12               | 1.62447832963153E-12 | ASPM     | <1E-12               | 1.62447832963153E-12 |
| ADAMTSL3 | <1E-12               | 1.62569957495862E-12 | AURKA    | 1.62447832963153E-12 | <1E-12               |
| ADH1B    | 1.62436730732907E-12 | 1.62447832963153E-12 | AURKB    | <1E-12               | <1E-12               |
| ADRB1    | 2.57571741713036E-13 | 3.26759952429256E-10 | B4GALT2  | <1E-12               | <1E-12               |
| ADRB2    | 1.62447832963153E-12 | 1.62436730732907E-12 | BIRC5    | 1.62436730732907E-12 | <1E-12               |
| AGTR1    | 1.62447832963153E-12 | <1E-12               | BUB1     | <1E-12               | 1.62447832963153E-12 |
| ANGPT1   | 1.62447832963153E-12 | 1.62625468647093E-12 | BUB1B    | 1.62447832963153E-12 | 1.62447832963153E-12 |
| AOC3     | <1E-12               | 1.62447832963153E-12 | BZW2     | 1.62447832963153E-12 | 1.62436730732907E-12 |
| AOX1     | 8.45350000000522E-05 | 5.81799999954669E-07 | CA9      | 1.6242562850266E-12  | <1E-12               |
| AQP4     | 1.62447832963153E-12 | <1E-12               | CAD      | 1.62436730732907E-12 | 1.62447832963153E-12 |
| ARHGAP6  | 1.62447832963153E-12 | 1.62447832963153E-12 | CBLC     | 1.62436730732907E-12 | <1E-12               |
| ASPA     | <1E-12               | 1.62447832963153E-12 | CCNA2    | <1E-12               | 1.62447832963153E-12 |
| BMP5     | 8.48270000020079E-07 | 1.62447832963153E-12 | CCNB1    | <1E-12               | 1.62436730732907E-12 |
| C1QTNF7  | <1E-12               | 1.62447832963153E-12 | CCNB2    | 1.62447832963153E-12 | <1E-12               |
| CA2      | 6.84479994905729E-09 | 3.58480023443519E-10 | CCNE1    | <1E-12               | 1.62436730732907E-12 |
| CA4      | 1.62436730732907E-12 | 1.62436730732907E-12 | CCNF     | <1E-12               | <1E-12               |
| CAB39L   | <1E-12               | 1.62447832963153E-12 | CCT3     | 1.62447832963153E-12 | <1E-12               |
| CASQ2    | 8.14880385391348E-11 | 9.29709997876671E-09 | CDC20    | 1.62447832963153E-12 | 1.62447832963153E-12 |
| CAV1     | <1E-12               | <1E-12               | CDC6     | <1E-12               | 1.62447832963153E-12 |
| CD33     | <1E-12               | <1E-12               | CDCA3    | 1.62458935193399E-12 | 1.62447832963153E-12 |
| CD36     | <1E-12               | 1.62447832963153E-12 | CDCA4    | <1E-12               | 1.62447832963153E-12 |
| CDH5     | <1E-12               | 1.62447832963153E-12 | CDCA8    | 1.62436730732907E-12 | 1.11022302462516E-16 |
| CDO1     | <1E-12               | 1.62458935193399E-12 | CDKN3    | <1E-12               | <1E-12               |
| CFD      | <1E-12               | 1.62447832963153E-12 | CENPA    | <1E-12               | 1.62458935193399E-12 |
| CHRD1    | 1.62458935193399E-12 | <1E-12               | CENPE    | 1.62436730732907E-12 | 1.62447832963153E-12 |
| CLDN18   | 1.62447832963153E-12 | 1.62447832963153E-12 | CENPF    | 1.62447832963153E-12 | <1E-12               |
| CLEC1A   | <1E-12               | <1E-12               | CENPM    | <1E-12               | <1E-12               |
| CLIC5    | <1E-12               | 1.62436730732907E-12 | CENPO    | 1.62447832963153E-12 | 1.62447832963153E-12 |
| CNN1     | 2.67179611768142E-11 | 1.24340004958867E-09 | CEP55    | 1.62436730732907E-12 | <1E-12               |
| CORO2B   | 3.66373598126302E-15 | 1.62447832963153E-12 | CHAF1A   | 1.62436730732907E-12 | <1E-12               |
| CPA3     | 7.65054686269195E-13 | 1.6251444634463E-12  | CHEK1    | <1E-12               | <1E-12               |
| CXCL12   | 1.6242562850266E-12  | 1.6251444634463E-12  | CHEK2    | 1.62447832963153E-12 | <1E-12               |
| CYB5A    | <1E-12               | 1.62447832963153E-12 | CIT      | 1.62447832963153E-12 | 3.52380347123926E-11 |
| DENND2A  | 1.62436730732907E-12 | <1E-12               | CKAP4    | <1E-12               | <1E-12               |
| DES      | 1.63435931455069E-12 | 7.75968178601261E-12 | COL10A1  | <1E-12               | 1.62447832963153E-12 |
| DNAI1    | 1.403190E-03         | 1.7558899999921E-05  | COL11A1  | 1.6242562850266E-12  | <1E-12               |
| DUOX1    | 1.62447832963153E-12 | 2.44249065417534E-15 | COL5A2   | <1E-12               | <1E-12               |
| DUSP1    | 1.5321077398272E-13  | <1E-12               | CYC1     | <1E-12               | <1E-12               |

|         |                      |                      |          |                      |                      |
|---------|----------------------|----------------------|----------|----------------------|----------------------|
| EFCAB1  | 1.445050E-04         | 6.49320000000175E-05 | DBN1     | 1.62458935193399E-12 | 1.62447832963153E-12 |
| EMCN    | <1E-12               | 1.62436730732907E-12 | DEPDC1   | 1.62447832963153E-12 | 1.62458935193399E-12 |
| ENG     | 1.62481139653892E-12 | <1E-12               | DLGAP5   | <1E-12               | <1E-12               |
| EPAS1   | 1.62447832963153E-12 | 1.62503344114384E-12 | DLX5     | 1.69348999999874E-05 | 2.44249065417534E-15 |
| F8      | 4.62196947381699E-12 | 1.62447832963153E-12 | DSG2     | <1E-12               | 1.62436730732907E-12 |
| FABP4   | 1.62503344114384E-12 | 1.62458935193399E-12 | DTL      | 1.62436730732907E-12 | 1.62447832963153E-12 |
| FAM107A | 2.37665442881507E-12 | 5.0003001739185E-11  | EIF2AK1  | 1.62436730732907E-12 | <1E-12               |
| FAM184A | 1.62447832963153E-12 | 1.62447832963153E-12 | EIF4EBP1 | 1.62447832963153E-12 | <1E-12               |
| FBLN5   | 1.62436730732907E-12 | 1.62447832963153E-12 | ENO2     | <1E-12               | <1E-12               |
| FCN3    | 2.06878958408652E-12 | 1.0170975173196E-11  | ERCC6L   | <1E-12               | <1E-12               |
| FGL2    | 4.25029999999715E-05 | 1.62447832963153E-12 | ESPL1    | <1E-12               | <1E-12               |
| FGR     | 1.62458935193399E-12 | <1E-12               | EXO1     | 1.62436730732907E-12 | 1.62447832963153E-12 |
| FHL1    | <1E-12               | 1.62447832963153E-12 | FANCI    | <1E-12               | <1E-12               |
| FHL5    | <1E-12               | 1.62447832963153E-12 | FEN1     | <1E-12               | 1.62447832963153E-12 |
| FMO2    | 1.62447832963153E-12 | 4.44089209850063E-16 | FERMT1   | <1E-12               | 1.62436730732907E-12 |
| FOLR1   | 3.62154750632726E-13 | 1.62447832963153E-12 | FKBP4    | <1E-12               | <1E-12               |
| FOXF1   | 1.62481139653892E-12 | 1.62447832963153E-12 | FOXM1    | 1.62447832963153E-12 | <1E-12               |
| FZD4    | 3.92630372658687E-12 | 1.62470037423645E-12 | GIN51    | <1E-12               | 1.62447832963153E-12 |
| GIMAP6  | 1.62436730732907E-12 | 1.62447832963153E-12 | GIN52    | <1E-12               | 1.62447832963153E-12 |
| GIPC2   | 1.6242562850266E-12  | 1.62436730732907E-12 | GIN53    | <1E-12               | <1E-12               |
| GNG11   | 1.81743509131138E-12 | <1E-12               | GMNN     | 1.62447832963153E-12 | 1.62447832963153E-12 |
| GPD1    | 1.62447832963153E-12 | 1.62447832963153E-12 | GORASP2  | <1E-12               | 1.62436730732907E-12 |
| GPD1L   | <1E-12               | 1.62447832963153E-12 | GPI      | <1E-12               | <1E-12               |
| GPM6A   | 1.62447832963153E-12 | 1.62447832963153E-12 | GPX2     | <1E-12               | <1E-12               |
| GPX3    | 1.62458935193399E-12 | 1.62458935193399E-12 | GREM1    | 1.62447832963153E-12 | 1.62436730732907E-12 |
| GYPC    | 1.62436730732907E-12 | 1.62447832963153E-12 | HJURP    | 1.62447832963153E-12 | <1E-12               |
| HBB     | 9.12340003544898E-09 | 7.00069999748365E-08 | HMMR     | 1.62436730732907E-12 | <1E-12               |
| HIGD1B  | <1E-12               | 1.62447832963153E-12 | HOXC6    | <1E-12               | <1E-12               |
| HLF     | 4.44089209850063E-16 | <1E-12               | HPRT1    | <1E-12               | <1E-12               |
| IFT57   | 1.74704695155015E-12 | <1E-12               | KIF11    | 1.62436730732907E-12 | 1.62447832963153E-12 |
| IGSF10  | <1E-12               | 1.62525548574877E-12 | KIF14    | 1.62447832963153E-12 | <1E-12               |
| IL18RAP | 5.789500E-04         | 2.00889999999454E-05 | KIF15    | 1.62447832963153E-12 | <1E-12               |
| IL33    | 1.62447832963153E-12 | 1.6251444634463E-12  | KIF20A   | <1E-12               | 1.62447832963153E-12 |
| ITGA8   | 1.76281211849982E-12 | 1.6538992397841E-12  | KIF23    | <1E-12               | <1E-12               |
| ITI5    | 1.62447832963153E-12 | <1E-12               | KIF2C    | <1E-12               | <1E-12               |
| ITM2A   | 3.33066907387547E-16 | <1E-12               | KIF4A    | <1E-12               | <1E-12               |
| JAM2    | 1.62458935193399E-12 | 1.62447832963153E-12 | KIFC1    | 1.62436730732907E-12 | <1E-12               |
| KCNA5   | 2.09220000213506E-08 | 1.61339996918031E-09 | LAPTM4B  | <1E-12               | 1.62458935193399E-12 |
| KLF2    | 2.29980479105052E-11 | 1.62592161956354E-12 | LMNB1    | 1.62447832963153E-12 | 1.62447832963153E-12 |
| KLF4    | 4.45532499782075E-13 | 2.57889998245275E-09 | LMNB2    | <1E-12               | 1.62447832963153E-12 |
| LDB2    | 1.62447832963153E-12 | 1.62447832963153E-12 | LRP8     | 1.62458935193399E-12 | <1E-12               |
| LEPR    | 1.63868918434673E-12 | 7.03470615093238E-12 | LSR      | <1E-12               | <1E-12               |
| LIMS2   | <1E-12               | 1.62447832963153E-12 | MAD2L1   | 1.62447832963153E-12 | <1E-12               |
| LMO2    | <1E-12               | 1.62447832963153E-12 | MARCKSL1 | 1.62447832963153E-12 | <1E-12               |
| LMOD1   | 2.12130313315129E-12 | 1.73061565078569E-12 | MCM10    | <1E-12               | 1.62447832963153E-12 |

|           |                      |                      |          |                      |                      |
|-----------|----------------------|----------------------|----------|----------------------|----------------------|
| LRRC32    | 3.99469346490378E-12 | 1.09249997937155E-09 | MCM2     | 1.62447832963153E-12 | 1.6242562850266E-12  |
| LRRC36    | 1.6251444634463E-12  | 1.62914126633495E-12 | MCM3     | <1E-12               | 1.62447832963153E-12 |
| LTBP4     | 1.6251444634463E-12  | 1.13242748511766E-14 | MCM4     | <1E-12               | <1E-12               |
| LYVE1     | 1.67232894199287E-12 | 1.76991754585742E-12 | MCM6     | <1E-12               | 1.62447832963153E-12 |
| MAMDC2    | 1.62458935193399E-12 | 1.62447832963153E-12 | MCM7     | <1E-12               | <1E-12               |
| MEIS1     | 3.34021699188725E-12 | 6.47659999999384E-05 | MELK     | <1E-12               | <1E-12               |
| MFAP4     | 1.62447832963153E-12 | <1E-12               | MKI67    | 1.62436730732907E-12 | <1E-12               |
| MGP       | 1.33639765920179E-11 | 1.62436730732907E-12 | MMP1     | 1.83170001388788E-09 | 1.62436730732907E-12 |
| MMRN1     | 9.97409932423921E-11 | 3.10651504520365E-12 | MMP11    | <1E-12               | 1.62447832963153E-12 |
| MMRN2     | <1E-12               | 1.62447832963153E-12 | MMP14    | <1E-12               | 1.62447832963153E-12 |
| MNDA      | 1.62436730732907E-12 | <1E-12               | MTHFD2   | <1E-12               | <1E-12               |
| MYCT1     | 1.62436730732907E-12 | 1.62447832963153E-12 | MYBL2    | <1E-12               | <1E-12               |
| MYH10     | 2.20279350315877E-12 | 3.64375196681976E-13 | NCAPG    | <1E-12               | 1.62458935193399E-12 |
| MYL9      | 1.62436730732907E-12 | 1.62436730732907E-12 | NDC80    | 1.62436730732907E-12 | <1E-12               |
| NR2F1     | 7.05889999785825E-08 | 1.62547753035369E-12 | NEK2     | <1E-12               | 1.62447832963153E-12 |
| NR4A3     | 9.6573000041289E-08  | 1.68370000053208E-07 | NETO2    | 1.62447832963153E-12 | 1.11022302462516E-16 |
| PALMD     | <1E-12               | 1.62458935193399E-12 | NIPSNAP1 | 1.62447832963153E-12 | 1.62436730732907E-12 |
| PCOLCE2   | <1E-12               | 1.62447832963153E-12 | NME4     | 1.62447832963153E-12 | <1E-12               |
| PDE2A     | 6.58729959468474E-10 | 2.98779889718048E-11 | NUF2     | 1.62447832963153E-12 | <1E-12               |
| PDE5A     | <1E-12               | 1.62581059726108E-12 | NUSAP1   | 1.62447832963153E-12 | 1.62436730732907E-12 |
| PDE8B     | 3.99680288865056E-14 | 1.62525548574877E-12 | OIP5     | 1.62447832963153E-12 | <1E-12               |
| PDK4      | 8.84709971948894E-10 | 2.60720334210873E-11 | PAICS    | <1E-12               | <1E-12               |
| PDZD2     | <1E-12               | 1.62447832963153E-12 | PAK6     | <1E-12               | <1E-12               |
| PIK3R1    | 2.54440912783593E-12 | 1.40150000005335E-06 | PBK      | 1.62447832963153E-12 | 1.62447832963153E-12 |
| PIP5K1B   | 1.62447832963153E-12 | 1.62447832963153E-12 | PCNA     | 1.11022302462516E-16 | <1E-12               |
| PKNOX2    | <1E-12               | 1.62447832963153E-12 | PDIA6    | <1E-12               | <1E-12               |
| PLAC8     | 2.96600521920709E-11 | 2.09179999988152E-07 | PLK1     | 1.62447832963153E-12 | <1E-12               |
| PLCE1     | 1.63624669369256E-12 | 1.65623070813581E-12 | PLOD2    | 1.62447832963153E-12 | <1E-12               |
| PLL       | 1.62447832963153E-12 | 1.62447832963153E-12 | PPAT     | 1.62458935193399E-12 | <1E-12               |
| PODXL     | 1.62436730732907E-12 | 1.62447832963153E-12 | PRAME    | 4.44089209850063E-16 | <1E-12               |
| PRX       | 1.63025148935958E-12 | 2.35522712443981E-12 | PRC1     | <1E-12               | 1.62447832963153E-12 |
| PTGER4    | 1.62436730732907E-12 | <1E-12               | PRPF19   | 1.62436730732907E-12 | <1E-12               |
| PZP       | 1.716050E-03         | 4.98640000001771E-06 | PSAT1    | 1.62447832963153E-12 | <1E-12               |
| RAB11FIP1 | 1.62447832963153E-12 | 1.62436730732907E-12 | PSMD2    | <1E-12               | 1.62447832963153E-12 |
| RAI2      | 1.62447832963153E-12 | <1E-12               | PTTG1    | 1.62458935193399E-12 | <1E-12               |
| RAMP3     | 1.64168678651322E-12 | 2.52076137741142E-12 | RACGAP1  | <1E-12               | <1E-12               |
| RASIP1    | <1E-12               | 1.62458935193399E-12 | RAD51AP1 | 1.62436730732907E-12 | <1E-12               |
| RBMS3     | 5.55111512312578E-16 | 1.62492241884138E-12 | RAD54L   | 1.62447832963153E-12 | 1.62436730732907E-12 |
| RGN       | 1.62625468647093E-12 | 1.62436730732907E-12 | RANGAP1  | 1.62447832963153E-12 | 1.62447832963153E-12 |
| ROBO4     | 1.62447832963153E-12 | 1.62447832963153E-12 | RCC1     | <1E-12               | <1E-12               |
| RSP01     | 8.32667268468867E-15 | 1.6068035790795E-11  | RFC2     | <1E-12               | 1.62447832963153E-12 |
| S1PR1     | 1.62447832963153E-12 | 1.62447832963153E-12 | RFC4     | <1E-12               | <1E-12               |
| SAMHD1    | 1.6242562850266E-12  | 1.62481139653892E-12 | RFWD3    | 1.6242562850266E-12  | <1E-12               |
| SCGB1A1   | 9.73829999972864E-07 | 2.05189999999966E-05 | RNASEH2A | 1.62436730732907E-12 | <1E-12               |
| SELENBP1  | <1E-12               | 1.62447832963153E-12 | RRM1     | <1E-12               | <1E-12               |

|                 |                      |                      |                 |                      |                             |
|-----------------|----------------------|----------------------|-----------------|----------------------|-----------------------------|
| <b>SELP</b>     | 1.66533453693773E-15 | 3.67272878776248E-12 | <b>RRM2</b>     | 1.62447832963153E-12 | <1E-12                      |
| <b>SEMA5A</b>   | 1.62436730732907E-12 | 1.94655402907529E-12 | <b>RSRC1</b>    | <1E-12               | <1E-12                      |
| <b>SGCA</b>     | 1.62447832963153E-12 | <1E-12               | <b>SHMT2</b>    | <1E-12               | 1.62447832963153E-12        |
| <b>SGCG</b>     | <1E-12               | 1.62481139653892E-12 | <b>SKP2</b>     | <1E-12               | <1E-12                      |
| <b>SLC14A1</b>  | 1.84450232865174E-11 | 1.535110E-03         | <b>SLC12A8</b>  | <1E-12               | 1.62470037423645E-12        |
| <b>SLC15A2</b>  | 1.62447832963153E-12 | 1.62436730732907E-12 | <b>SLC6A8</b>   | 1.62447832963153E-12 | <1E-12                      |
| <b>SLC19A3</b>  | 1.62436730732907E-12 | 1.62447832963153E-12 | <b>SLC7A5</b>   | <1E-12               | <1E-12                      |
| <b>SLC1A1</b>   | <1E-12               | 1.62436730732907E-12 | <b>SMARCB1</b>  | 1.62436730732907E-12 | 1.62436730732907E-12        |
| <b>SLIT3</b>    | 1.62481139653892E-12 | 3.33066907387547E-16 | <b>SOX4</b>     | 1.62447832963153E-12 | <1E-12                      |
| <b>SLPI</b>     | 5.23000531771345E-11 | 1.62481139653892E-12 | <b>SPAG5</b>    | <1E-12               | <b>1.62447832963153E-12</b> |
| <b>SOX17</b>    | 2.18119966532981E-11 | 1.64646074551911E-12 | <b>SPINT2</b>   | 1.62447832963153E-12 | <1E-12                      |
| <b>SPARCL1</b>  | 1.62447832963153E-12 | 1.0547118733939E-14  | <b>SPP1</b>     | <1E-12               | 1.62436730732907E-12        |
| <b>SRPX</b>     | 3.11572989630804E-12 | 1.51419998761781E-09 | <b>SPRR1A</b>   | 1.344130E-03         | <1E-12                      |
| <b>STARD13</b>  | 1.62436730732907E-12 | 1.62447832963153E-12 | <b>SPTBN2</b>   | <1E-12               | <1E-12                      |
| <b>STARD8</b>   | 1.4432899320127E-15  | 1.62447832963153E-12 | <b>SRM</b>      | <1E-12               | <1E-12                      |
| <b>STXBP6</b>   | 1.62447832963153E-12 | 1.62725388719309E-12 | <b>SRPK1</b>    | 1.62447832963153E-12 | 1.62436730732907E-12        |
| <b>SYNM</b>     | 1.62447832963153E-12 | 1.62458935193399E-12 | <b>SSR4</b>     | <1E-12               | 1.62581059726108E-12        |
| <b>TAL1</b>     | 1.62447832963153E-12 | <1E-12               | <b>STMN1</b>    | 1.62447832963153E-12 | <1E-12                      |
| <b>TBX4</b>     | <1E-12               | 1.62492241884138E-12 | <b>SULF1</b>    | 1.62436730732907E-12 | <1E-12                      |
| <b>TCF21</b>    | 1.62447832963153E-12 | 1.62447832963153E-12 | <b>SYT1</b>     | 3.88145071639201E-12 | 1.02140518265514E-13        |
| <b>TMEM100</b>  | 3.44013706410351E-12 | 4.65860683362962E-12 | <b>TFAP2C</b>   | <1E-12               | <1E-12                      |
| <b>TMEM47</b>   | 1.62447832963153E-12 | 6.66133814775094E-16 | <b>THY1</b>     | <1E-12               | 8.70399999963745E-07        |
| <b>TNXB</b>     | 4.44089209850063E-16 | 1.6974199823494E-12  | <b>TIMELESS</b> | 1.11022302462516E-16 | 1.62447832963153E-12        |
| <b>TPPP3</b>    | 6.00399951977693E-10 | 3.33366667604196E-12 | <b>TK1</b>      | 1.62447832963153E-12 | <1E-12                      |
| <b>TRHDE</b>    | <1E-12               | 1.11022302462516E-15 | <b>TMEM106C</b> | <1E-12               | 1.6242562850266E-12         |
| <b>TRPC6</b>    | 9.538300E-03         | 1.65156777143238E-12 | <b>TMEM132A</b> | 1.11022302462516E-16 | 1.62447832963153E-12        |
| <b>TSPAN12</b>  | 1.62436730732907E-12 | <1E-12               | <b>TMEM158</b>  | <1E-12               | <1E-12                      |
| <b>VIPR1</b>    | 3.35698135955909E-12 | 2.15489848187644E-11 | <b>TMPRSS4</b>  | <1E-12               | 1.62447832963153E-12        |
| <b>VWF</b>      | 7.43849426498855E-15 | 6.61679600000298E-11 | <b>TOP2A</b>    | 1.62447832963153E-12 | <1E-12                      |
| <b>WFDC1</b>    | 3.9190872769268E-14  | <1E-12               | <b>TPX2</b>     | <1E-12               | <1E-12                      |
| <b>WISP2</b>    | 1.13209441821027E-12 | 6.58073595616315E-12 | <b>TROAP</b>    | <1E-12               | 1.62436730732907E-12        |
| <b>ZBTB16</b>   | 9.05719999000354E-09 | 1.05640000080953E-08 | <b>TTK</b>      | 1.62447832963153E-12 | 1.62447832963153E-12        |
| <b>DPEP2</b>    | <1E-12               | <1E-12               | <b>TUBG1</b>    | 1.62447832963153E-12 | 1.62447832963153E-12        |
| <b>C1orf115</b> | <1E-12               | 1.62458935193399E-12 | <b>TYMS</b>     | <1E-12               | <1E-12                      |
| <b>CAV2</b>     | 1.62447832963153E-12 | 1.62447832963153E-12 | <b>UBE2C</b>    | <1E-12               | <1E-12                      |
| <b>COBL</b>     | 1.62436730732907E-12 | <1E-12               | <b>UCHL1</b>    | 1.11022302462516E-16 | <1E-12                      |
| <b>CYP4B1</b>   | 1.62447832963153E-12 | 1.62447832963153E-12 | <b>UCK2</b>     | <1E-12               | <1E-12                      |
| <b>ENPP4</b>    | 7.7715611723761E-15  | 1.62436730732907E-12 | <b>UNG</b>      | 1.62447832963153E-12 | 1.62447832963153E-12        |
| <b>FEZ1</b>     | 1.62447832963153E-12 | 3.277000E-03         | <b>WDR12</b>    | 1.62447832963153E-12 | <1E-12                      |
| <b>GPRASP1</b>  | 2.81339995744645E-09 | 1.63036251166204E-12 | <b>ZWILCH</b>   | 1.62436730732907E-12 | <1E-12                      |
| <b>HSPB6</b>    | <1E-12               | 1.62436730732907E-12 | <b>ZWINT</b>    | 1.62447832963153E-12 | <1E-12                      |
| <b>ID4</b>      | 1.62447832963153E-12 | 2.6274538100779E-12  | <b>CDCP1</b>    | <1E-12               | 1.11022302462516E-16        |
| <b>LAMP3</b>    | <1E-12               | 1.62447832963153E-12 | <b>COX6B1</b>   | <1E-12               | <1E-12                      |
| <b>LDB3</b>     | 4.82960338388239E-11 | 2.8164004461928E-10  | <b>E2F8</b>     | 1.62436730732907E-12 | <1E-12                      |

|                |                      |                      |                 |                      |                      |
|----------------|----------------------|----------------------|-----------------|----------------------|----------------------|
| <b>NPR3</b>    | 7.74070000320037E-08 | 1.606450E-01         | <b>ENO1</b>     | 1.62447832963153E-12 | 1.62447832963153E-12 |
| <b>RFX2</b>    | 1.92210000027337E-07 | 1.37569999947296E-07 | <b>FUT3</b>     | 1.62436730732907E-12 | <1E-12               |
| <b>RGL1</b>    | 2.19260165579271E-11 | 1.62447832963153E-12 | <b>ITGB4</b>    | 1.62447832963153E-12 | 1.62447832963153E-12 |
| <b>RTN1</b>    | <1E-12               | 2.09920003602093E-09 | <b>LAD1</b>     | 1.62447832963153E-12 | <1E-12               |
| <b>SEC14L3</b> | 1.178090E-04         | 1.969320E-04         | <b>LRRC15</b>   | <1E-12               | 1.62436730732907E-12 |
| <b>TCEAL2</b>  | 1.63369318073592E-12 | 1.17949983113874E-10 | <b>MDH2</b>     | 1.62447832963153E-12 | <1E-12               |
| <b>TTLL7</b>   | 3.49389961407098E-10 | 3.02420000042325E-07 | <b>PLAU</b>     | 1.62458935193399E-12 | <1E-12               |
|                |                      |                      | <b>RAB38</b>    | <1E-12               | <1E-12               |
|                |                      |                      | <b>SDC1</b>     | <1E-12               | <1E-12               |
|                |                      |                      | <b>SERPINH1</b> | <1E-12               | 1.62447832963153E-12 |
|                |                      |                      | <b>SHC1</b>     | 1.62447832963153E-12 | 1.62436730732907E-12 |
|                |                      |                      | <b>TMC5</b>     | 1.62458935193399E-12 | 1.62447832963153E-12 |
